# Supplementary material for: Rhachotropis (Eusiroidea, Amphipoda) from the North East Atlantic
Source: Zookeys. 2018 Jan 23;(731):75–101. doi: 10.3897/zookeys.731.19814 (PMC5810106; doi:10.3897/zookeys.731.19814)
Supplement: Supplementary material 1 — Table S1. Extended overview of all samples used in analyses with geographical and environmental details [file zookeys-731-075-s001.xlsx]

## Sheet: Sheet1
Species name	Collection registration number	Sample number	GenBank number	BOLD number	Area collected	Depth (m(	Temperature (C)	Lat	Lon	sediment notes
Sequences new with this work
Rhachotropis aculeata (Lepechin, 1780)	ZMH-K-46753	DZMB-HH 52572	xx	AMPIV200-17	Norwegian Sea	579.1		66.289	-12.347
Rhachotropis aculeata (Lepechin, 1780)	UMBergen_NB_amp77	UMBergen_NB_amp77	xx	AMPNB077-13	Spitsbergen, Isfjorden	123.13		78.27	14.356
Rhachotropis aff inflata (Sars, 1883)	ZMBN_111583	ZMBN_111583	xx	AMPNB524-17	Spitsbergen, Kongsfjord Kapp Mitra	110.0		79.1179	11.0833
Rhachotropis aff palporum Stebbing, 1908	ZMH-K-46754	DZMB-HH 51954	xx	AMPIV033-17	South Iceland, Area 7	913.6		62.9387	-20.7435
Rhachotropis aff palporum Stebbing, 1908	ZMH-K-46755	DZMB-HH 52105	xx	AMPIV003-17	South Iceland, Area 7	913.6		62.9387	-20.7435
Rhachotropis aff proxima	ZMH-K-46756	DZMB-HH 52024	xx	AMPIV005-17	South Iceland Area 1	2749.4		60.0455	-21.4677
Rhachotropis cf proxima Chevreux, 1911	ZMH-K-46757	DZMB-HH 52103	xx	AMPIV001-17	South Iceland, Area 7	913.6		62.9387	-20.7435
Rhachotropis cf proxima Chevreux, 1911	ZMH-K-46758	DZMB-HH 52104	xx	AMPIV002-17	South Iceland, Area 7	913.6		62.9387	-20.7435
Rhachotropis gislii Thurston, 1980	ZMH-K-46759	DZMB-HH 52023	xx	AMPIV004-17	South Iceland Area 1	2749.4		60.0455	-21.4677
Rhachotropis aff helleri (Boeck, 1871)	ZMH-K-46760	DZMB-HH 52078	xx	AMPIV010-17	South Iceland Reykjanes Ridge Sector 9	289.4		63.3085	-23.1577
Rhachotropis aff helleri (Boeck, 1871)	ZMH-K-46761	DZMB-HH 52079	xx	AMPIV011-17	South Iceland Reykjanes Ridge Sector 9	289.4		63.3085	-23.1577
Rhachotropis helleri (Boeck, 1871)	ZMH-K-46762	DZMB-HH 56318	xx	AMPIV233-17	Norwegian Channel	302.5		61.9972	0.50666
Rhachotropis helleri (Boeck, 1871)	ZMBN_104067	ZMBN_104067	xx	AMPNB276-15	Skjoldryggen	357.0	7.01	65.2822	6.28326	sandy silt (no gravel)
Rhachotropis aff helleri (Boeck, 1871)	ZMBN_104068	ZMBN_104068	xx	AMPNB277-15	Skjoldryggen	542.0	2.6	65.1735	5.93128	silty sand (no gravel)
Rhachotropis aff helleri (Boeck, 1871)	ZMBN_104069	ZMBN_104069	xx	AMPNB278-15	Skjoldryggen	357.0	7.01	65.2822	6.28326	sandy silt (no gravel)
Rhachotropis aff helleri (Boeck, 1871)	ZMBN_104070	ZMBN_104070	xx	AMPNB279-15	Skjoldryggen	614.0	-0.12	65.6271	5.57554	sandy silt (no gravel)
Rhachotropis helleri (Boeck, 1871)	ZMBN_108154	ZMBN_108154	xx	AMPNB381-16	Sognesjøen S of Ytre Sula, Norway	307	13.3	60.98173	4.72791	sandy silt (no gravel)
Rhachotropis aff helleri (Boeck, 1871)	ZMBN_111540	ZMBN_111540	xx	AMPNB481-17	Nordland VI	846.075	-0.84	67.3496	8.64192	sandy silt (some gravel)
Rhachotropis inflata (Sars, 1883)	ZMH-K-46763	DZMB-HH 52524	xx	AMPIV070-17	FI ridge middle, Area 14	510.9		63.1017	-8.572
Rhachotropis inflata (Sars, 1883)	UMBergen_NB_amp78	UMBergen_NB_amp78	xx	AMPNB078-13	Spitsbergen, Isfjorden	123.13		78.27	14.356
Rhachotropis lomonosovi Gurjanova, 1934	ZMBN_104530	ZMBN_104530	xx	AMPNB352-15	Nordland VI	823	-0.56	67.805	9.685	sandy silt (some gravel)
Rhachotropis macropus Sars, 1893	ZMBN_108173	ZMBN_108173	xx	AMPNB413-16	Sognefjord, Norway	1232	10.4	61.04246	5.41423	fine gravel and mud, stones
Rhachotropis macropus Sars, 1893	ZMBN_108180	ZMBN_108180	xx	AMPNB420-16	Sognefjord, Årdalsfjord, Norway	127		61.22981	7.69044
Rhachotropis macropus Sars, 1893	ZMBN_108184	ZMBN_108184	xx	AMPNB424-16	Sognefjord, Norway	1232	10.4	61.04246	5.41423	fine gravel and mud, stones
Rhachotropis macropus Sars, 1893	ZMBN_108204	ZMBN_108204	xx	AMPNB387-16	Sognefjord, Aurlandsfjord, Norway	336		60.9118	7.16836
Rhachotropis macropus Sars, 1893	ZMBN_108205	ZMBN_108205	xx	AMPNB443-16	Sognefjord, Lustrafjord, Norway	327		61.43212	7.47763
Rhachotropis macropus Sars, 1893	ZMBN_108206	ZMBN_108206	xx	AMPNB444-16	Sognefjord, Norway	1265	10.0	61.14626	5.94370	mud
Rhachotropis macropus Sars, 1893	ZMBN_108230	ZMBN_108230	xx	AMPNB466-16	Sognefjord, Aurlandsfjord, Norway	336		60.9118	7.16836
Rhachotropis macropus Sars, 1893	ZMBN_112427	ZMBN_112427	xx	AMPNB526-17	Spitsbergen, N Rijpfjord	340.27	-0.5 (stipulated from area)	80.15141	16.93460
Rhachotropis northriana d'Udekem d'Acoz, Vader & Legezinska, 2007	ZMH-K-46764	DZMB-HH 56228	xx	AMPIV227-17	Norwegian Channel	169.1		61.4272	1.35116
Rhachotropis northriana d'Udekem d'Acoz, Vader & Legezinska, 2007	ZMH-K-46765	DZMB-HH 56900	xx	AMPIV224-17	Norwegian Channel	169.1		61.4272	1.35116
Rhachotropis northriana d'Udekem d'Acoz, Vader & Legezinska, 2007	ZMH-K-46766	DZMB-HH 56901	xx	AMPIV225-17	Norwegian Channel	169.1		61.4272	1.35116
Rhachotropis northriana d'Udekem d'Acoz, Vader & Legezinska, 2007	ZMH-K-46767	DZMB-HH 56902	xx	AMPIV231-17	Norwegian Channel	169.1		61.4272	1.35116
Rhachotropis northriana d'Udekem d'Acoz, Vader & Legezinska, 2007	ZMH-K-46768	DZMB.HH 56233	xx	AMPIV230-17	Norwegian Channel	169.1		61.4272	1.35116
Rhachotropis oculata (Hansen, 1887)	ZMH-K-46769	DZMB-HH 56116	xx	AMPIV228-17	Denmark Strait	118.8		66.6433	-24.5328
Rhachotropis sp. nov B	ZMH-K-46770	DZMB-HH 52028	xx	AMPIV009-17	South Iceland, Area 6	1384.8		62.5517	-20.3952
Rhachotropis thordisae Thurston, 1980	ZMH-K-46771	DZMB-HH 51965	xx	AMPIV034-17	South Iceland Area 1	2749.4		60.0455	-21.4677
Rhachotropis thordisae Thurston, 1980	ZMH-K-46772	DZMB-HH 52026	xx	AMPIV007-17	South Iceland Area 1	2749.4		60.0455	-21.4677
Rhachotropis thordisae Thurston, 1980	ZMH-K-46773	DZMB-HH 52027	xx	AMPIV008-17	South Iceland Area 1	2749.4		60.0455	-21.4677
Rhachotropis thordisae Thurston, 1980	ZMH-K-46774	DZMB-HH 56320	xx	AMPIV226-17	South Iceland Area 1	2749.4		60.0455	-21.4677
Rhachotropis thorkelli Thurston, 1980	ZMH-K-46775	DZMB-HH 52025	xx	AMPIV006-17	South Iceland Area 1	2749.4		60.0455	-21.4677
Rhachotropis thorkelli Thurston, 1980	ZMH-K-46776	DZMB-HH 52544	xx	AMPIV078-17	South Iceland Irminger Basin Area 11	2504.7		61.6417	-31.3562
Eusirus holmi Hansen, 1887	ZMBN_104545	ZMBN_104545	xx	AMPNB367-15	Nordland V	842.0		67.35	8.642
Eusirus holmi Hansen, 1887	ZMH-K-46777	DZMB-HH 52335	xx	AMPIV038-17	Norwegian Channel sector 03	587.4		62.1523	0.2585
Eusirus holmi Hansen, 1887	ZMH-K-46778	DZMB-HH 52336	xx	AMPIV039-17	Norwegian Channel sector 03	587.4		62.1523	0.2585
Eusirus holmi Hansen, 1887	ZMH-K-46779	DZMB-HH 52334	xx	AMPIV037-17	Norwegian Channel sector 03	587.4		62.1523	0.2585
Eusirus holmi Hansen, 1887	ZMH-K-46780	DZMB-HH 52337	xx	AMPIV040-17	Norwegian Channel sector 03	587.4		62.1523	0.2585
Eusirus holmi Hansen, 1887	ZMH-K-46781	DZMB-HH 52333	xx	AMPIV036-17	Norwegian Channel sector 03	587.4		62.1523	0.2585
Sequences mined from GenBank
Rhachotropis abyssalis Lörz, 2010	NIWA60483	60483	GU804296	AMPNZ095-09	Ross Sea	3380		-66.85	171.9
Rhachotropis abyssalis Lörz, 2011	NIWA60484	60484	GU80484	AMPNZ094-09	Ross Sea	3380		-66.85	171.9
Rhachotropis aculeata (Lepechin, 1780)	GSL31-39	GSL31-39	FJ581879	WWGSL070-08	St. Lawrence Gulf	94		48.15	-63.54
Rhachotropis aculeata (Lepechin, 1780)	GSL31-07	GSL31-07	FJ581880	WW865-08	St. Lawrence Gulf	65		47.90	-65.35
Rhachotropis aculeata (Lepechin, 1780)	TE-004T21-40-04	TE-004T21-40-04	FJ581881	WWGSL098-08	St. Lawrence Gulf	150		48.39	-59.55
Rhachotropis aculeata (Lepechin, 1780)	TE-004T69-02	TE-004T69-02	FJ581882	WW851-08	St. Lawrence Gulf	233		50.82	-58.59
Rhachotropis aculeata (Lepechin, 1780)	TE-004T69-01	TE-004T69-01	FJ581883	WW850-08	St. Lawrence Gulf	233		50.82	-58.59
Rhachotropis aculeata (Lepechin, 1780)	RA03CN0906	RA03CN0906	FJ581884	WW105-07	St. Lawrence Gulf	128		49.92	-64.62
Rhachotropis aculeata (Lepechin, 1780)	RA02CN0306	RA02CN0306	FJ581885	WW129-07	St. Lawrence Gulf	163		51.14	-58.05
Rhachotropis aculeata (Lepechin, 1780)	BSM07T13-04	BSM07T13-04	FJ581886	WW459-08	Cote-Nord	120		50.25	-66.70
Rhachotropis aculeata (Lepechin, 1780)	BSM07T13-03	BSM07T13-03	FJ581887	WW458-08	Cote-Nord	120		50.25	-66.70
Rhachotropis aculeata (Lepechin, 1780)	OD158	OD158	JQ412470	BENTH312-08	Chukchi Sea	45		70.00	-168.40
Rhachotropis aculeata (Lepechin, 1780)	OD159	OD159	JQ412471	BENTH313-08	Chukchi Sea	45		70.00	-168.40
Rhachotropis aculeata (Lepechin, 1780)	OD160	OD160	JQ412469	BENTH314-08	Chukchi Sea	45		70.00	-168.40
Rhachotropis aculeata (Lepechin, 1780)	3L-WT772-S60-01	3L-WT772-S60-01	JQ412480	WW402-08	Grand Bank	74		46.61	-49.24
Rhachotropis aculeata (Lepechin, 1780)	NUN-0228	NUN-0228	JQ412476	CCNUN228-07	Somerset Island	35		72.77	-93.36
Rhachotropis aculeata (Lepechin, 1780)	NUN-0149	NUN-0149	JQ412465	CCNUN149-07	Resolute	5		74.68	-94.86
Rhachotropis aculeata (Lepechin, 1780)	NUN-0150	NUN-0150	JQ412468	CCNUN150-07	Resolute	5		74.68	-94.86
Rhachotropis aculeata (Lepechin, 1780)	NUN-0151	NUN-0151	JQ412467	CCNUN151-07	Resolute	5		74.68	-94.86
Rhachotropis aculeata (Lepechin, 1780)	NUN-0152	NUN-0152	JQ412466	CCNUN152-07	Resolute	5		74.68	-94.86
Rhachotropis aculeata (Lepechin, 1780)	NUN-0178	NUN-0178	JQ412475	CCNUN178-07	Devon Island	3		74.67	-91.70
Rhachotropis aculeata (Lepechin, 1780)	NUN-0005	NUN-0005	JQ412473	CCNUN005-07	Devon Island	55		75.76	-88.12
Rhachotropis aculeata (Lepechin, 1780)	MaEus000	MaEus000	DQ889127	RBGC036-03	Resolute	3
Rhachotropis aculeata (Lepechin, 1780)	CA196	CA196	JQ412474	WW023-07	Beaufort Sea	34		70.90	-128.90
Rhachotropis aculeata (Lepechin, 1780)	CA197	CA197	JQ412472	WW024-07	Beaufort Sea	34		70.90	-128.90
Rhachotropis aculeata (Lepechin, 1780)	AY271853	AY271853	AY271853	GBCMA0080-06	Resolute	50
Rhachotropis inflata (Sars, 1883)	CCNUN620	CCNUN620	JQ412491	CCNUN620-08	Resolute	130
Rhachotropis inflata (Sars, 1883)	CCNUN621	CCNUN621	JQ412492	CCNUN621-08	Resolute	130
Rhachotropis inflata (Sars, 1883)	CCNUN622	CCNUN622	JQ412493	CCNUN622-08	Resolute	130
Rhachotropis inflata (Sars, 1883)	NUN-0334	NUN-0334	JQ412487	CCNUN334-07	Igloolik	2		69.37	-81.79
Rhachotropis inflata (Sars, 1883)	NUN-0154	NUN-0154	JQ412489	CCNUN154-07	Resolute	3		74.68	-94.86
Rhachotropis inflata (Sars, 1883)	NUN-0155	NUN-0155	JQ412498	CCNUN155-07	Resolute	3		74.68	-94.86
Rhachotropis inflata (Sars, 1883)	NUN-0156	NUN-0156	JQ412488	CCNUN156-07	Resolute	3		74.68	-94.86
Rhachotropis inflata (Sars, 1883)	NUN-0157	NUN-0157	JQ412497	CCNUN157-07	Resolute	3		74.68	-94.86
Rhachotropis inflata (Sars, 1883)	NUN-0158	NUN-0158	JQ412499	CCNUN158-07	Resolute	3		74.68	-94.86
Rhachotropis inflata (Sars, 1883)	NUN-0159	NUN-0159	JQ412495	CCNUN159-07	Resolute	3		74.68	-94.86
Rhachotropis inflata (Sars, 1883)	NUN-0160	NUN-0160	JQ412494	CCNUN160-07	Resolute	3		74.68	-94.86
Rhachotropis inflata (Sars, 1883)	NUN-0161	NUN-0161	JQ412490	CCNUN161-07	Resolute	3		74.68	-94.86
Rhachotropis inflata (Sars, 1883)	NUN-0162	NUN-0162	JQ412496	CCNUN162-07	Resolute	3		74.68	-94.86
Rhachotropis inflata (Sars, 1883)	MaEus002	MaEus002	JQ412486	RBGC038-03	Resolute	3
Rhachotropis inflata (Sars, 1883)	AY271854	AY271854	AY271854	GBCMA0081-06	Resolute	3
Rhachotropis chathamensis Lörz, 2010	NIWA42768.d	42768.d	GU804298	AMPNZ101-09	New Zealand	418		-43.80	175.32
Rhachotropis chathamensis Lörz, 2010	NIWA42768.c	42768.c	GU804299	AMPNZ100-09	New Zealand	418		-43.80	175.32
Rhachotropis chathamensis Lörz, 2010	NIWA42768.a	42768.a	GU804300	AMPNZ098-09	New Zealand	418		-43.80	175.32
Rhachotropis novazealandica Lörz, 2012	NIWA42864	42864	GU804309	AMPNZ128-09	New Zealand	520		-44.13	174.85
Rhachotropis rossi Lörz, 2010	NIWA45813	45813	JF498593	ANZR470-08	Ross Sea	3210		-68.33	178.22
Rhachotropis lomonosovi Gurjanova, 1934
Rhachotropis palporum Stebbing, 1908
