# Supplementary material for: Rhachotropis (Eusiroidea, Amphipoda) from the North East Atlantic
Source: PubMed Central journal article supplement (PMC5810106; doi:10.3897/zookeys.731.19814), 2018-01-23
Supplement: zookeys-731-075-s004.pdf [file zookeys-731-075-s004.pdf]

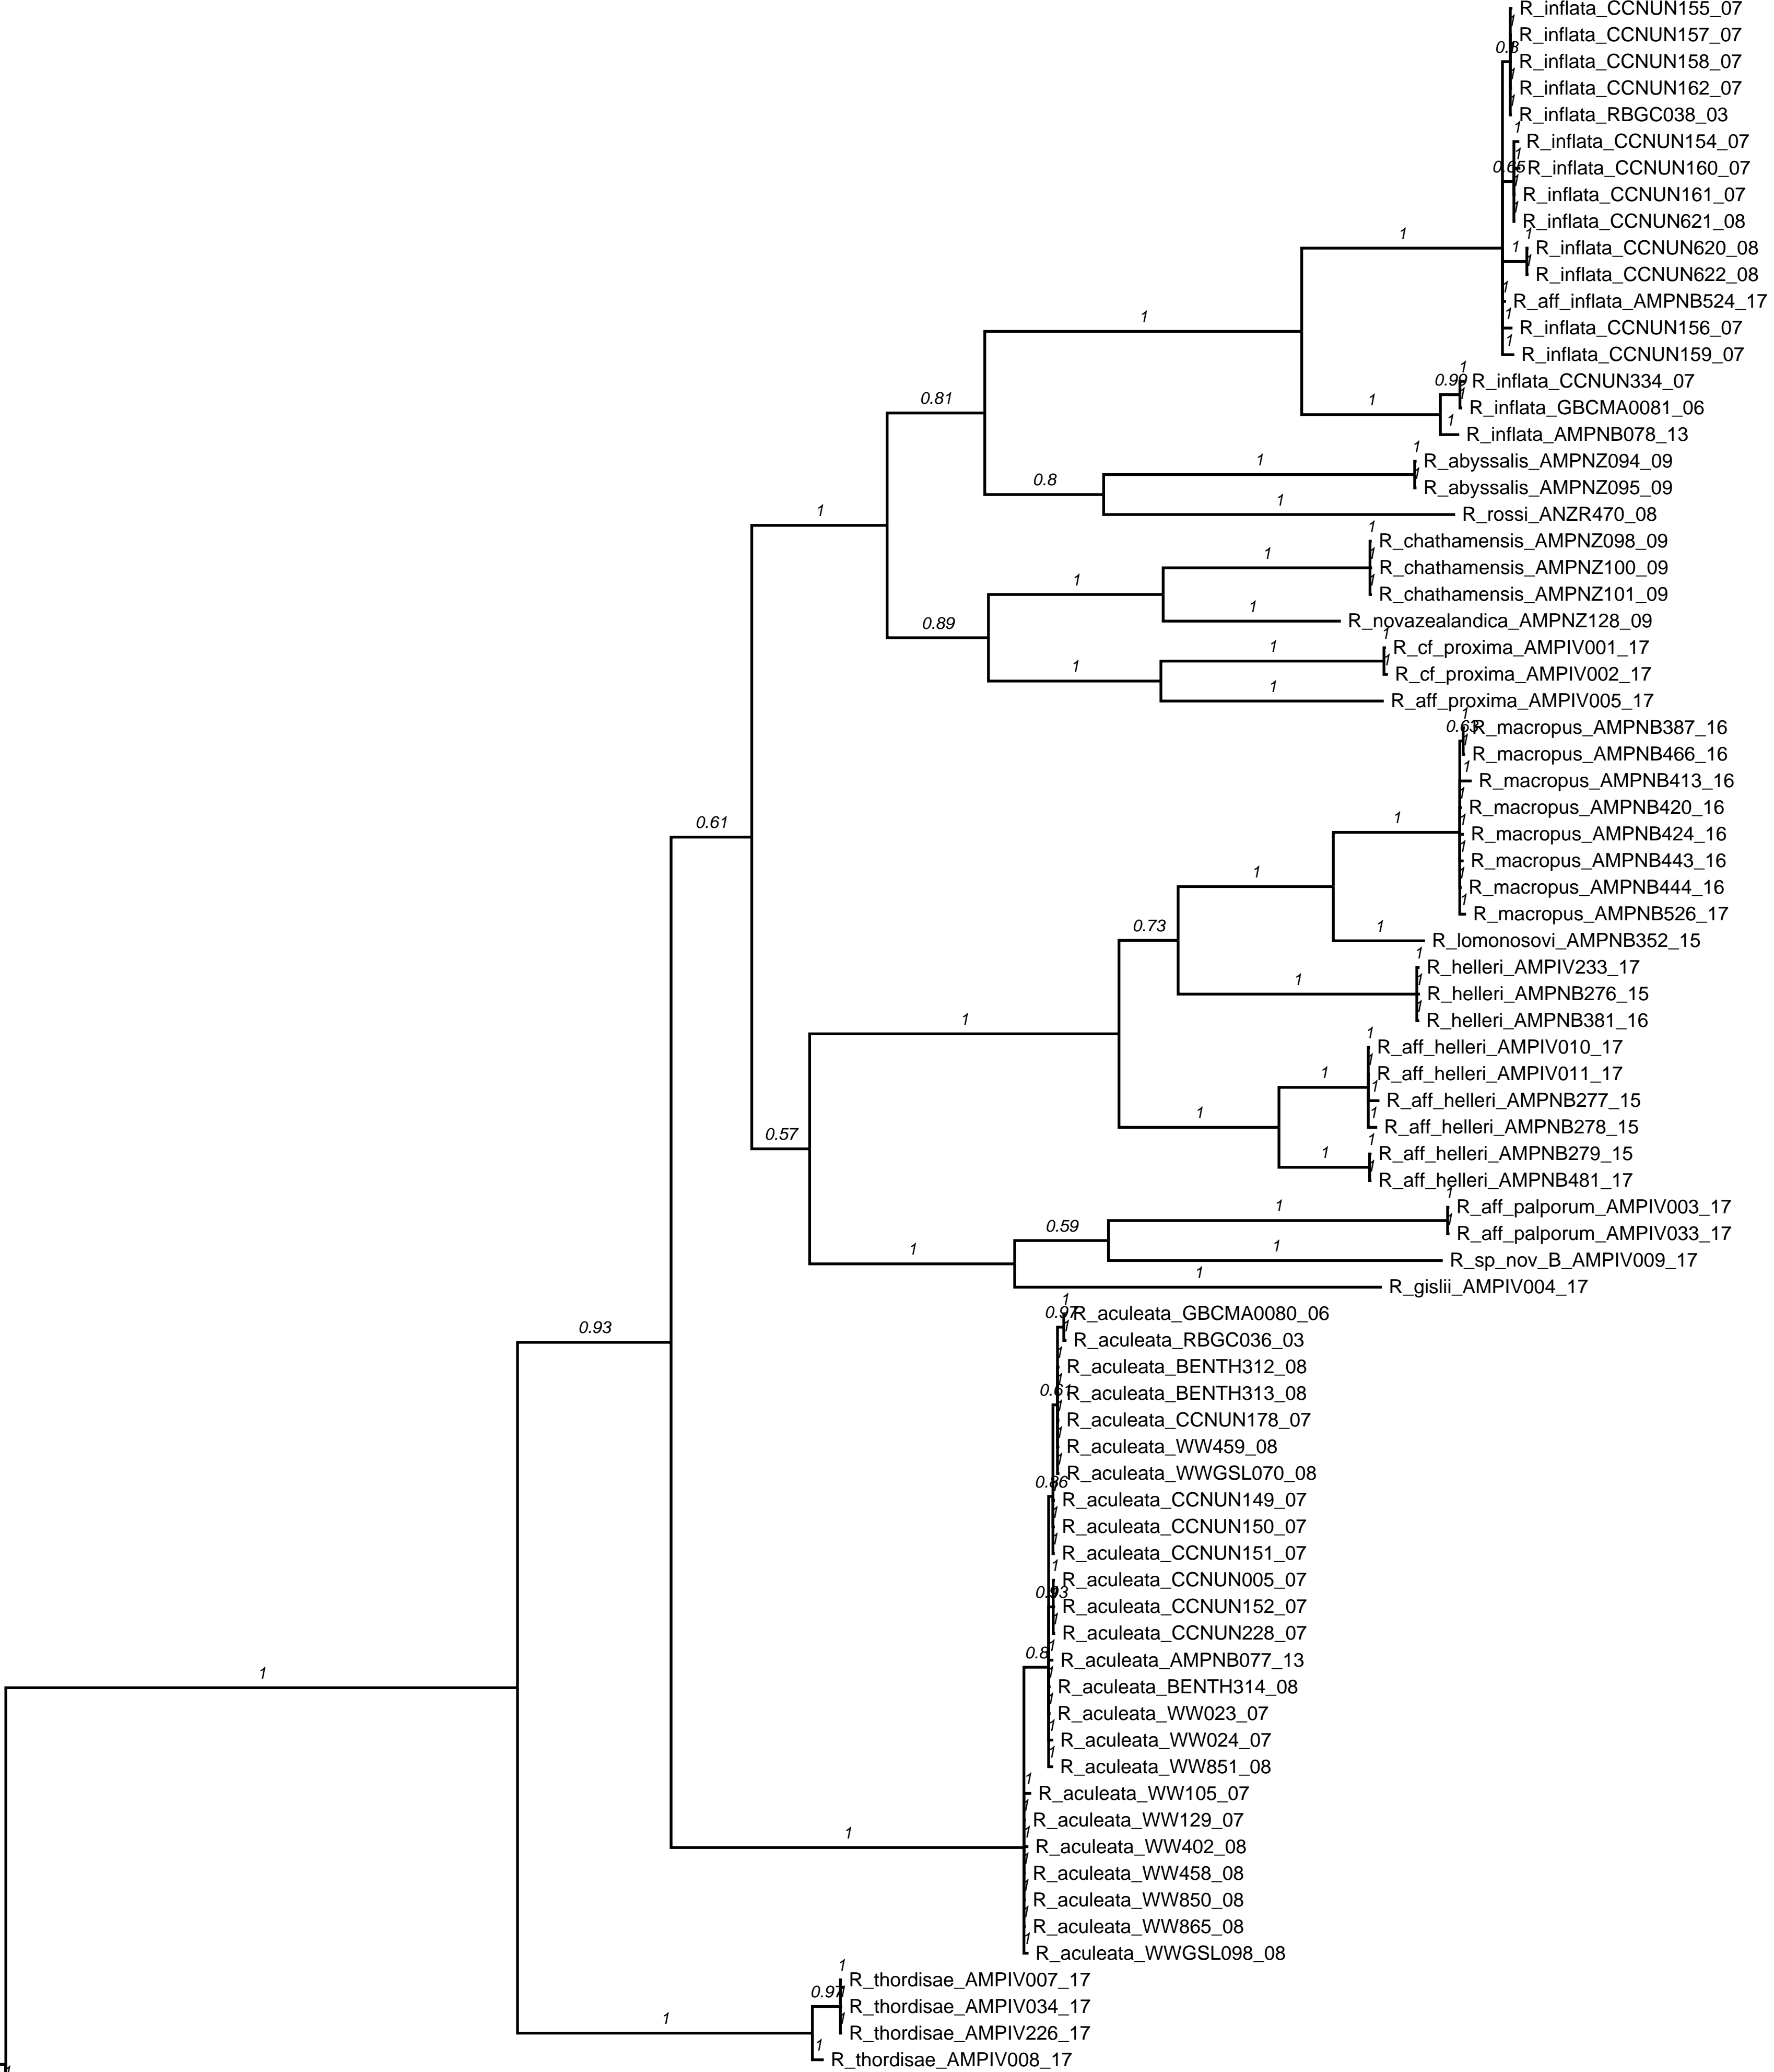

E\_holmii\_AMPNIV037\_17  
 E\_holmii\_AMPNIV038\_17  
 E\_holmii\_AMPNIV039\_17  
 E\_holmii\_AMPNIV040\_17  
 E\_holmii\_AMPNB367\_15

0.1
